# Supplementary material
Source: PubMed Central journal article supplement (PMC11629364)
Supplement: sj-pdf-1-jcb-10.1177_0271678X241305480.pdf [file sj-pdf-1-jcb-10.1177_0271678X241305480.pdf]

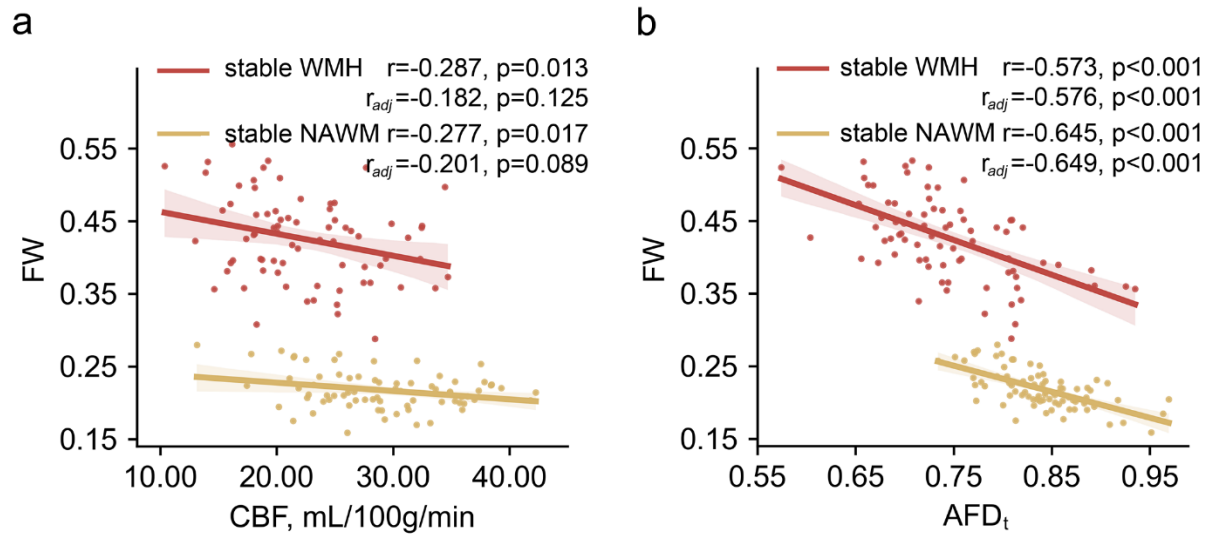

**Fig. S1** Associations between CBF,  $AFD_t$  and FW in stable WMH/ NAWM. a, Correlation between FW and CBF. b, Correlation between FW and  $AFD_t$ . WMH = White matter hyperintensities; NAWM = Normal appearing WM; FW = Free water; CBF = Cerebral blood flow;  $AFD_t$  = Total apparent fiber density.

**Table S1** Fixed Effects Results for WMH FW in the CSVD group

| Independent variables                      | model 1                 |              | model 2                 |              |
|--------------------------------------------|-------------------------|--------------|-------------------------|--------------|
|                                            | Estimate (95% CI)       | p value      | Estimate (95% CI)       | p value      |
| Age                                        | 0.006 (-0.013, 0.025)   | 0.531        | 0.001 (-0.016, 0.018)   | 0.908        |
| Age×Time                                   | -0.002 (-0.007, 0.003)  | 0.450        | -0.002 (-0.007, 0.003)  | 0.448        |
| Sex                                        | 0.388 (0.048, 0.729)    | 0.028        | 0.398 (0.087, 0.710)    | 0.014        |
| Time                                       | 0.386 (0.053, 0.719)    | 0.027        | 0.378 (0.039, 0.717)    | 0.033        |
| VRF score Zsc                              | -0.162 (-0.336, 0.011)  | 0.071        | -0.197 (-0.358, -0.036) | 0.019        |
| <b><i>VRF score Zsc×Time</i></b>           | 0.005 (-0.040, 0.050)   | 0.824        | 0.005 (-0.039, 0.050)   | 0.812        |
| WMH CBF Zsc                                | -0.127 (-0.306, 0.053)  | 0.171        | -0.017 (-0.192, 0.159)  | 0.853        |
| <b><i>WMH CBF Zsc×Time</i></b>             | -0.009 (-0.056, 0.037)  | 0.698        | -0.009 (-0.057, 0.040)  | 0.720        |
| WMH AFD <sub>t</sub> Zsc                   | -0.497 (-0.656, -0.338) | <0.001       | -0.481 (-0.627, -0.334) | <0.001       |
| <b><i>WMH AFD<sub>t</sub> Zsc×Time</i></b> | -0.053 (-0.095, -0.011) | <b>0.016</b> | -0.052 (-0.094, -0.010) | <b>0.018</b> |
| SVD score                                  | -                       | -            | 0.268 (0.125, 0.411)    | <0.001       |
| SVD score×Time                             | -                       | -            | 0.003 (-0.037, 0.042)   | 0.895        |

Interaction terms in bold italic represent whether a specific factor could predict the progression of FW. P values <0.05 are indicated in bold. Zsc is short of Z score. WMH = White matter hyperintensities; VRF = Vascular risk factor; CBF = Cerebral blood flow; AFD<sub>t</sub> = Total apparent fiber density; SVD score = small vessel disease score.

**Table S2** Fixed Effects Results for NAWM FW in the CSVD group

| Independent variables                       | model 1                 |              | model 2                 |         |
|---------------------------------------------|-------------------------|--------------|-------------------------|---------|
|                                             | Estimate (95% CI)       | p value      | Estimate (95% CI)       | p value |
| Age                                         | 0.025 (0.010, 0.040)    | 0.002        | 0.020 (0.005, 0.034)    | 0.008   |
| Age×Time                                    | 0.000 (-0.004, 0.004)   | 0.901        | 0.000 (-0.004, 0.004)   | 0.992   |
| Sex                                         | -0.013 (-0.307, 0.281)  | 0.931        | -0.013 (-0.282, 0.256)  | 0.925   |
| Time                                        | 0.144 (-0.118, 0.406)   | 0.286        | 0.136 (-0.133, 0.405)   | 0.326   |
| VRF score Zsc                               | -0.107 (-0.253, 0.039)  | 0.156        | -0.140 (-0.272, -0.007) | 0.043   |
| <b><i>VRF score Zsc×Time</i></b>            | -0.004 (-0.040, 0.032)  | 0.829        | -0.005 (-0.041, 0.031)  | 0.778   |
| NAWM CBF Zsc                                | -0.109 (-0.252, 0.034)  | 0.141        | -0.025 (-0.160, 0.110)  | 0.720   |
| <b><i>NAWM CBF Zsc×Time</i></b>             | -0.011 (-0.047, 0.025)  | 0.550        | -0.008 (-0.046, 0.029)  | 0.665   |
| NAWM AFD <sub>t</sub> Zsc                   | -0.528 (-0.668, -0.389) | <0.001       | -0.494 (-0.621, -0.367) | <0.001  |
| <b><i>NAWM AFD<sub>t</sub> Zsc×Time</i></b> | -0.036 (-0.070, -0.001) | <b>0.047</b> | -0.034 (-0.069, 0.001)  | 0.060   |
| SVD score                                   | -                       | -            | 0.247 (0.130, 0.365)    | <0.001  |
| SVD score×Time                              | -                       | -            | 0.009 (-0.023, 0.042)   | 0.571   |

Interaction terms in bold italic represent whether a specific factor could predict the progression of FW. P values <0.05 are indicated in bold. Zsc is short of Z score. NAWM = Normal appearing white matter; VRF = Vascular risk factor; CBF = Cerebral blood flow; AFD<sub>t</sub> = Total apparent fiber density; SVD score = small vessel disease score.
